# Supplementary material for: 5 years of Sentinel-5P TROPOMI operational ozone profiling and geophysical validation using ozonesonde and lidar ground-based networks
Source: Copernicus journal article supplement (doi:10.5194/amt-17-3969-2024), 2024-07-04
Supplement: Supplementary file 1 [file amt-17-3969-2024-supplement.pdf]

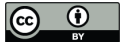

*Supplement of*

## **5 years of Sentinel-5P TROPOMI operational ozone profiling and geophysical validation using ozonesonde and lidar ground-based networks**

**Arno Keppens et al.**

*Correspondence to:* Arno Keppens ([arno.keppens@aeronomie.be](mailto:arno.keppens@aeronomie.be))

The copyright of individual parts of the supplement might differ from the article licence.

**Table S1.** List of ozonesonde stations (90° to 20° north) providing correlative data for the TROPOMI validation in this work. Subsequent columns show the station name, location, archive / PI institute abbreviation, validation period (Full for the entire five year TROPOMI time range: May 2018 to April 2023), and number of co-locations in the comparative validation. Horizontal black lines separate the latitude zones defined in Figure 3.

| Name                | Location [°N,°E] | Archive / PI inst. | Period [YY/MM] | Co-locs. |
|---------------------|------------------|--------------------|----------------|----------|
| Alert               | [82.45, -62.51]  | WOUDC / MSC        | 18/05 - 22/06  | 91       |
| Eureka              | [79.99, -85.93]  | WOUDC / MSC        | 18/05 - 23/03  | 151      |
| Ny-Alesund          | [78.93, 11.93]   | NDACC / AWI        | 18/05 - 23/03  | 123      |
| Resolute            | [74.72, -94.98]  | NDACC / MSC        | 18/05 - 20/04  | 56       |
| Scoresbysund        | [70.48, -21.95]  | NDACC / DMI        | Full           | 174      |
| Sodankyla           | [67.37, 26.63]   | NDACC / FMI        | Full           | 107      |
| Jokioinen           | [60.81, 23.50]   | NDACC / FMI        | 20/01 - 22/04  | 9        |
| Lerwick             | [60.13, -1.18]   | NDACC / UKMO       | 18/05 - 22/09  | 201      |
| Churchill           | [58.74, -94.07]  | NDACC / MSC        | 19/01 - 22/02  | 103      |
| Edmonton            | [53.55, -114.10] | NDACC / MSC        | Full           | 197      |
| Goose Bay           | [53.31, -60.36]  | NDACC / MSC        | 18/05 - 22/06  | 126      |
| Legionowo           | [52.40, 20.97]   | NDACC / IMGW       | Full           | 238      |
| Lindenberg          | [52.21, 14.12]   | NDACC / DWD        | Full           | 245      |
| De Bilt             | [52.10, 5.18]    | NDACC / KNMI       | 18/05 - 23/03  | 195      |
| Valentia            | [51.94, -10.25]  | NDACC / ME         | Full           | 128      |
| Uccle               | [50.80, 4.35]    | NDACC / RMI        | Full           | 659      |
| Port Hardy          | [50.68, -127.38] | WOUDC / MSC        | 18/06 - 23/03  | 117      |
| Praha               | [50.00, 14.44]   | NDACC / CHMI       | 19/01 - 23/04  | 234      |
| Hohenpeissenberg    | [47.81, 11.01]   | WOUDC / DWD        | Full           | 626      |
| Payerne             | [46.82, 6.95]    | WOUDC / MeteoSwiss | Full           | 548      |
| Obs. Haute Provence | [43.94, 5.71]    | NDACC / LATMOS     | 18/05 - 22/11  | 189      |
| Yarmouth            | [43.87, -66.11]  | WOUDC / MSC        | 18/05 - 22/06  | 186      |
| Trinidad Head       | [40.80, -124.15] | NOAA / GML         | Full           | 212      |
| Madrid              | [40.45, -3.72]   | WOUDC / INM        | Full           | 236      |
| Boulder             | [40.03, -105.25] | NOAA / GML         | Full           | 275      |
| Wallops Island      | [37.93, -75.48]  | NDACC / NASA       | 18/05 - 22/06  | 152      |
| Tsukuba             | [36.05, 140.13]  | WOUDC / JMA        | Full           | 210      |
| Huntsville          | [34.72, -86.64]  | NOAA / UAH         | 18/05 - 20/03  | 22       |
| Izana               | [28.31, -16.50]  | NDACC / AEMET      | 18/05 - 22/12  | 182      |
| Taipei              | [25.04, 121.51]  | WOUDC / CWBT       | 18/11 - 22/03  | 17       |
| Hong Kong Obs.      | [22.31, 114.17]  | WOUDC / HKO        | 18/05 - 22/06  | 183      |
| Hanoi               | [21.03, 105.85]  | SHADOZ / GSFC      | 18/05 - 21/11  | 84       |

**Table S2.** List of ozonesonde stations (20° north to 90° south) providing correlative data for the TROPOMI validation in this work. Subsequent columns show the station name, location, archive / PI institute abbreviation, validation period (Full for the entire five year TROPOMI time range: May 2018 to April 2023), and number of co-locations in the comparative validation. Horizontal black lines separate the latitude zones defined in Figure 3.

| Name                 | Location [°N,°E]  | Archive / PI inst.  | Period [YY/MM] | Co-locs. |
|----------------------|-------------------|---------------------|----------------|----------|
| Hilo                 | [19.72, -155.07]  | NOAA / GML          | Full           | 237      |
| Costa Rica (3 locs.) | [9.94, -84.04]    | SHADOZ / NCAR       | 18/05 - 23/03  | 112      |
| Paramaribo           | [5.81, -55.22]    | NDACC / KNMI        | Full           | 161      |
| Sepang Airport       | [2.73, 101.70]    | SHADOZ / MMD        | 18/05 - 22/12  | 79       |
| Quito                | [-0.20, -78.44]   | SHADOZ / USFQ       | 21/10 - 22/11  | 10       |
| San Cristobal        | [-0.92, -89.60]   | SHADOZ / USFQ       | 21/12 - 22/12  | 23       |
| Nairobi              | [-1.27, 36.80]    | SHADOZ / MeteoSwiss | 18/06 - 20/03  | 43       |
| Ascension Island     | [-1.98, -14.42]   | SHADOZ / GSFC       | 18/05 - 22/09  | 144      |
| Natal                | [-5.83, -35.20]   | SHADOZ / INPE       | 18/05 - 22/12  | 83       |
| Watukosek            | [-7.50, 112.60]   | SHADOZ / BRIN       | 21/03 - 22/12  | 23       |
| Pago Pago            | [-14.23, -170.56] | NOAA / GML          | Full           | 155      |
| Suva                 | [-18.13, 178.40]  | NOAA / GML          | Full           | 54       |
| St. Denis            | [-20.90, 55.48]   | SHADOZ / LACY       | 18/05 - 20/12  | 87       |
| Irene                | [-25.92, 28.22]   | SHADOZ / SAWS       | 18/05 - 22/08  | 33       |
| Broadmeadows         | [-37.69, 144.95]  | WOUDC / ABM         | 18/05 - 23/02  | 226      |
| Lauder               | [-45.04, 169.68]  | NDACC / NIWA        | 18/05 - 22/06  | 208      |
| Macquarie            | [-54.50, 158.95]  | WOUDC / ABM         | 18/05 - 23/02  | 231      |
| Ushuaia              | [-54.85, -68.31]  | WOUDC / SMNA        | 18/08 - 19/11  | 18       |
| Marambio             | [-64.23, -56.62]  | WOUDC / FMI         | 18/08 - 19/11  | 43       |
| Dumont d'Urville     | [-66.67, 140.02]  | NDACC / LATMOS      | 18/08 - 19/12  | 13       |
| Davis                | [-68.58, 77.97]   | WOUDC / ABM         | 18/08 - 23/02  | 166      |
| Syowa                | [-69.01, 39.58]   | WOUDC / JMA         | 18/08 - 23/04  | 176      |
| Neumayer             | [-70.68, -8.26]   | NDACC / AWI         | 18/08 - 23/03  | 209      |
| Belgrano             | [-77.77, -38.18]  | NDACC / INTA        | 18/10 - 23/02  | 52       |
| Amundsen Scott       | [-89.98, -24.80]  | NOAA / GML          | 18/10 - 21/11  | 72       |
| South Pole           | [-90.00, -169.00] | NOAA / GML          | 19/11 - 23/03  | 55       |

**Table S3.** List of DIAL stations providing correlative data for the TROPOMI validation in this work. Subsequent columns show the station name, location, archive / PI institute abbreviation, validation period (Full for the entire five year TROPOMI time range), and number of co-locations in the comparative validation. The horizontal black line separates tropospheric (top) and stratospheric (bottom) lidar instruments.

| Name                | Location [°N,°E] | Archive / PI inst. | Period [YY/MM] | Co-locs. |
|---------------------|------------------|--------------------|----------------|----------|
| Greenbelt           | [38.99, -76.84]  | TOLNet / GSFC      | 20/05 - 21/07  | 118      |
| Langley             | [37.10, -76.39]  | TOLNet / LaRC      | 18/05 - 19/11  | 15       |
| Huntsville          | [34.72, -86.64]  | TOLNet / UAH       | 18/05 - 20/08  | 103      |
| Table Mountain (t.) | [34.40, -117.70] | TOLNet / JPL       | 18/05 - 20/07  | 456      |
| Eureka              | [79.99, -85.93]  | NDACC / U. Toronto | 20/03          | 2        |
| Hohenpeissenberg    | [47.81, 11.01]   | NDACC / DWD        | Full           | 532      |
| Obs. Haute Provence | [43.94, 5.71]    | NDACC / LATMOS     | Full           | 595      |
| Table Mountain (s.) | [34.40, -117.70] | NDACC / JPL        | Full           | 722      |
| Mauna Loa           | [19.53, -155.58] | NDACC / JPL        | 18/05 - 22/11  | 592      |
| Lauder              | [-45.04, 169.68] | NDACC / NIWA       | 18/05 - 21/07  | 108      |

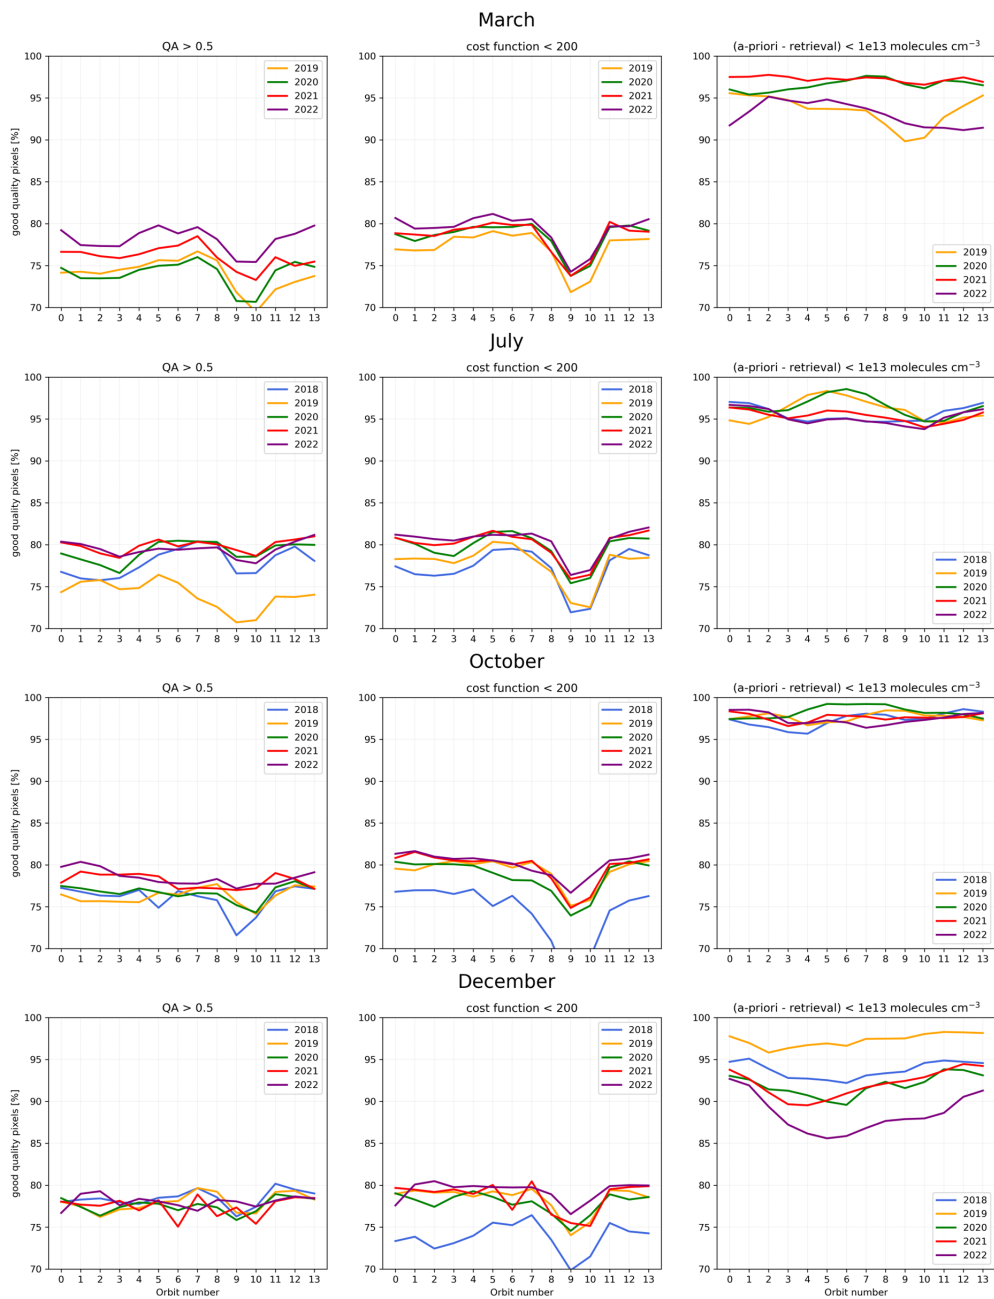

**Figure S1.** The percentage of good quality pixels after applying separately each of the recommended filters on the QA value, cost function, the a-priori condition in Eq. (2). Each line represents the average percentage of the same orbit number over all the days of the specific month analysed.

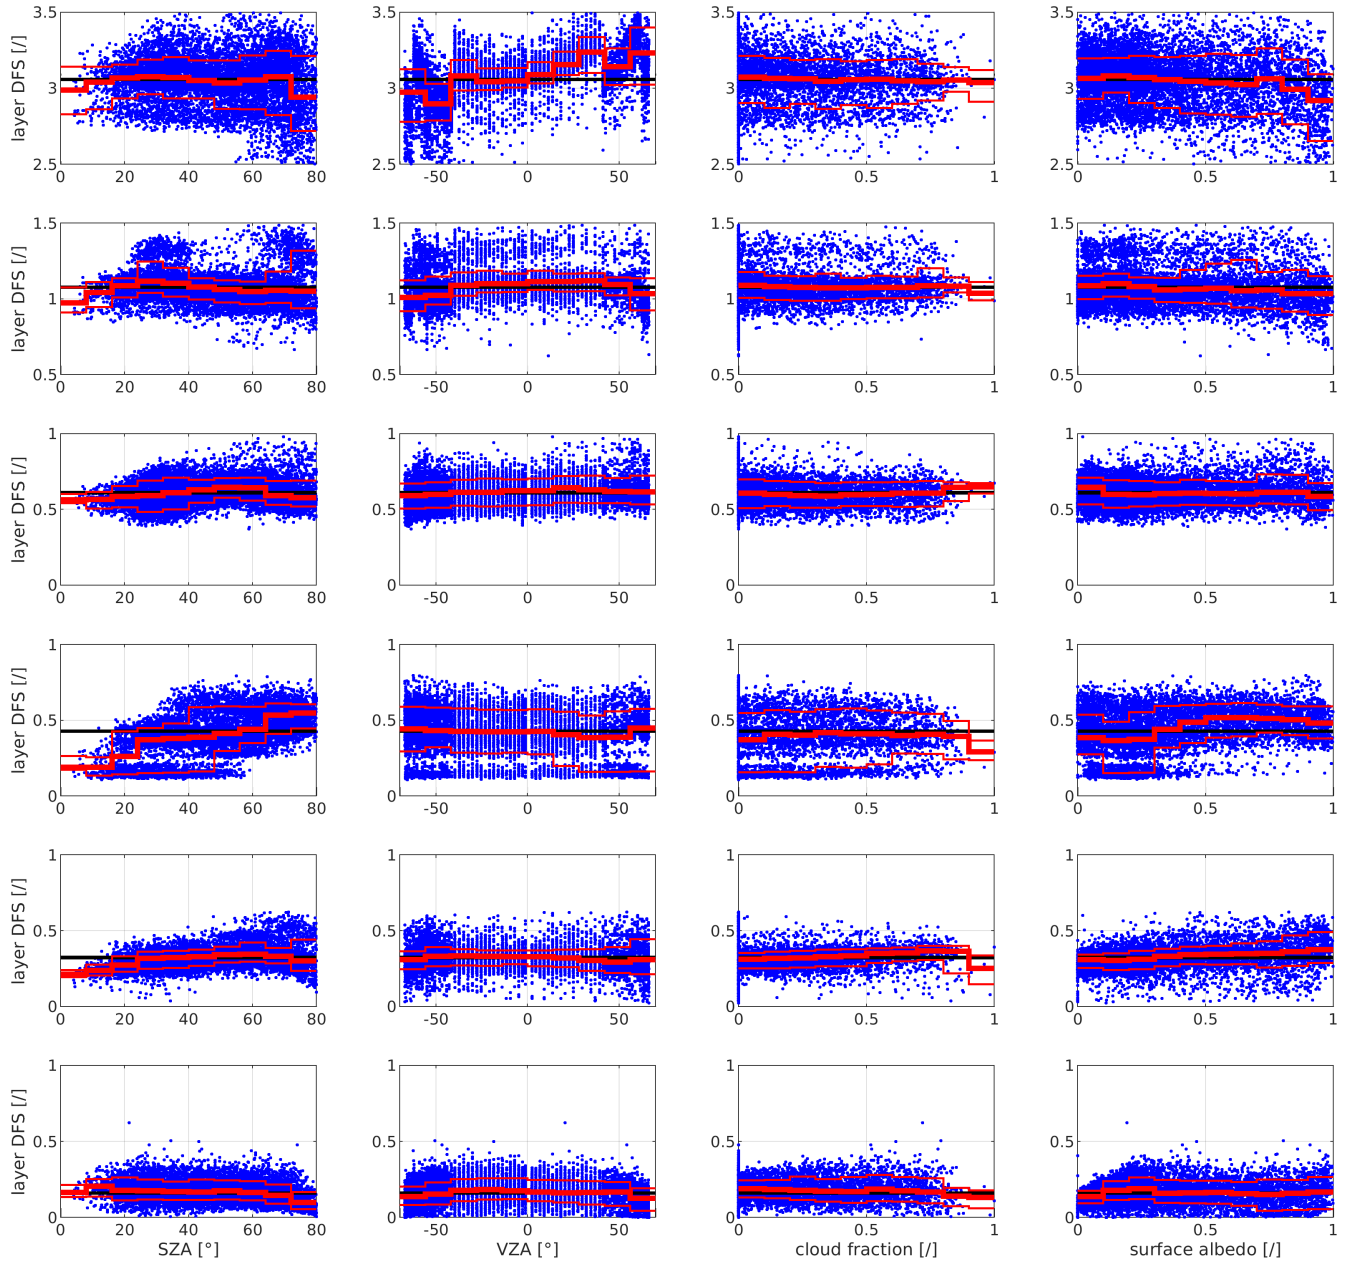

**Figure S2.** Layer-DFS (bottom to top row: 0-6 km, 6-12 km, 12-18 km, 18-24 km, 24-32 km, 32-82 km) as a function of (from left to right) solar zenith angle (SZA), viewing zenith angle (VZA), cloud fraction, and surface albedo. 84, 50, and 16 % quantiles are added in red for ten bins (with a thicker line for the median), together with the overall layer mean (black line).

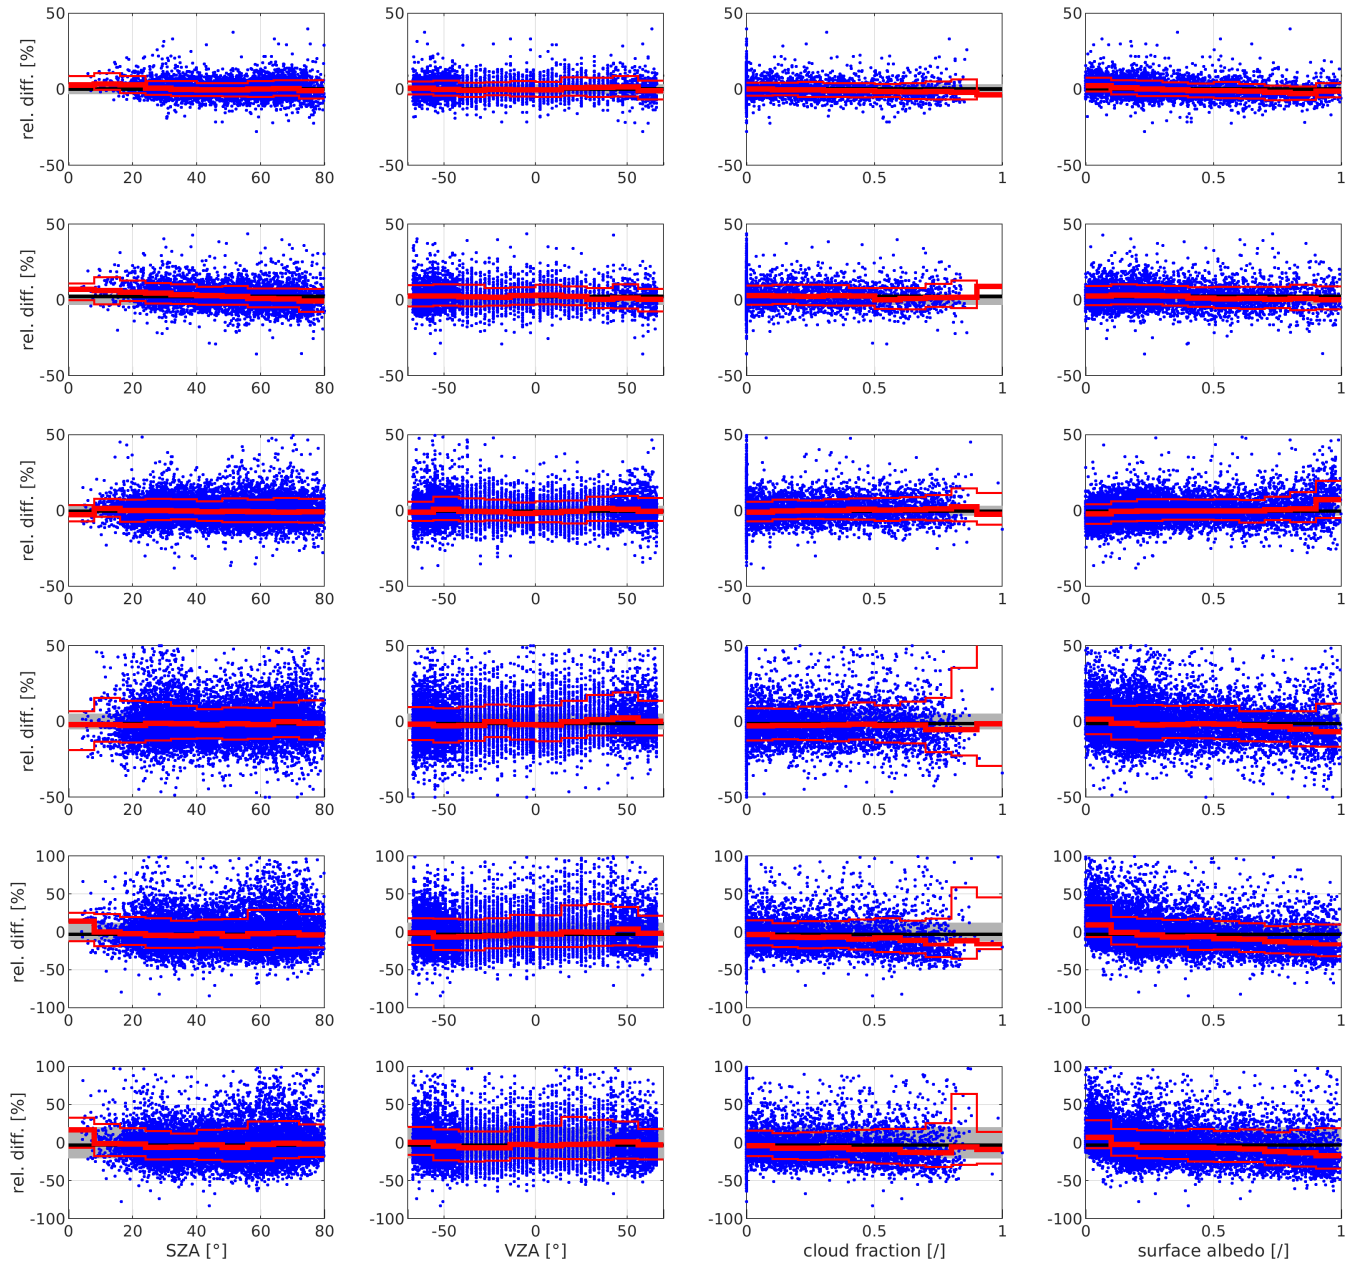

**Figure S3.** Differences between the lowest five ozone subcolumns as observed by TROPOMI and the coincident vertically integrated ozonesonde measurements (bottom to second row: 0-6 km, 6-12 km, 12-18 km, 18-24 km, 24-32 km), and their overall sum (top row). Subsequent columns show the differences as a function of solar zenith angle (SZA), viewing zenith angle (VZA), cloud fraction, and surface albedo. 84, 50, and 16 % quantiles are added in red for ten bins (with a thicker line for the median), together with the overall mean difference (black line), and the product requirements for each subcolumn (grey areas).

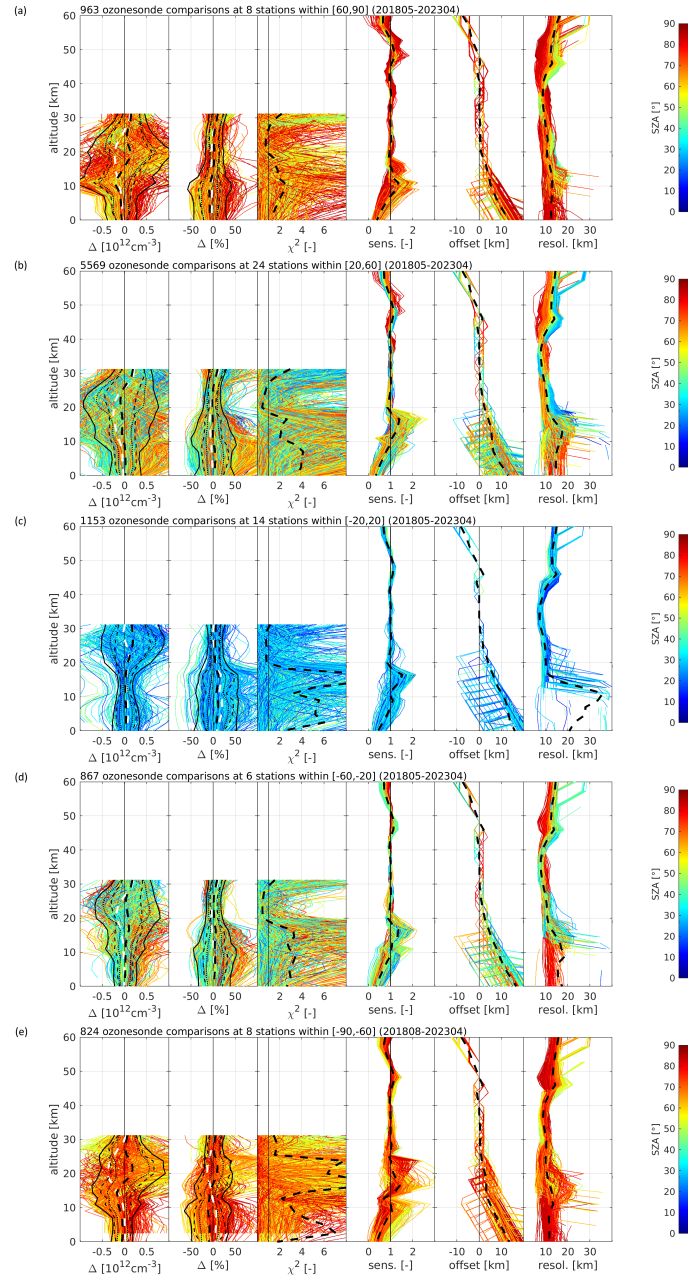

**Figure S4.** Comparison between S5P RPRO/OFFL ozone number density profile data and all co-located ozonesonde reference measurements, for five latitude bands sorted north (a) to south (e). Each panel shows six graphs, respectively, from left to right: the difference and the percent relative difference between S5P and ozonesonde, the chi-square ( $\chi^2$ ) profile, the vertical sensitivity, the altitude registration offset, and the averaging kernel FWHM associated with the satellite retrieval. The colour scale indicates the TROPOMI solar zenith angle. Black dashed lines show mean values (thick lines) and standard deviations (thin lines, around the mean), while white dashed lines indicate the mean difference between the a-priori profile and the reference measurement. Dotted black lines indicate the total ex-ante (inductive) uncertainty of TROPOMI and the reference measurements combined (around the mean difference). The black full lines show the same, after adding the retrieval's smoothing error.
